# Supplementary material
Source: PubMed Central journal article supplement (PMC11102405)
Supplement: 12311_2023_1546_MOESM1_ESM.pdf [file 12311_2023_1546_MOESM1_ESM.pdf]

## Supplementary Data

A common underlying data model was established. Here we show, examples for attribute mappings and transformation code mappings as well as calculations. While for some attributes a one-to-one mapping to a data model attribute ("Target\_Attribute") was possible, for others transformations or calculations were necessary.

### a) Attribute Mapping

| Source      | Source_Attribute               | Target_Attribute | Transformation |
|-------------|--------------------------------|------------------|----------------|
| SCAregistry | sex                            | SEX              | cm001          |
| SCAregistry | yob                            | DOB              |                |
| SCAregistry | AOO                            | ONSET_GAIT       |                |
| CRC-SCA     | DNATestingRepeatsExpandedAllel | LONG             |                |
| CRC-SCA     | FunctionalStage                | DISEASE_STAGE    | cm012          |

### b) Code Mapping

| Code_Mapping | Source_Value | Core_Equivalent |
|--------------|--------------|-----------------|
| cm001        | m            | 0               |
| cm001        | f            | 1               |
| cm001        | male         | 0               |
| cm001        | female       | 1               |
| cm012        | 0            | 0               |
| cm012        | 0,5          | 0               |
| cm012        | 1            | 0               |
| cm012        | 1,5          | 1               |
| cm012        | 2            | 1               |
| cm012        | 2,5          | 1               |
| cm012        | 3            | 2               |
| cm012        | 3,5          | 2               |
| cm012        | 4            | 2               |
| cm012        | 4,5          | 2               |
| cm012        | 5            | 3               |
| cm012        | 5,5          | 3               |
| cm012        | 6            | 3               |

### c) Calculations

| Source  | Attribute  | Function                                  |
|---------|------------|-------------------------------------------|
| CRC-SCA | ONSET_GAIT | ADDTIME(DOB, WALKINGPROBLEMSYEAR, unit=Y) |
